# Supplementary material for: Ethnicity matters in perceived impacts and information sources of COVID-19 among mothers with young children in Australia: a cross-sectional study
Source: PubMed Central journal article supplement — BMJ Open. 2021 Nov 25;11(11):e050557. doi: 10.1136/bmjopen-2021-050557 (PMC8627368; doi:10.1136/bmjopen-2021-050557), 2021-11-25
Supplement: bmjopen-2021-050557supp001.pdf [file bmjopen-2021-050557supp001.pdf]

## Supplementary document: survey questions, variables and coding

| Labels                            | Questions                                                                                              | Responses                  | Coding          |
|-----------------------------------|--------------------------------------------------------------------------------------------------------|----------------------------|-----------------|
| <b>Covid-19 impact</b>            |                                                                                                        |                            |                 |
| <b>Perceived behaviour change</b> |                                                                                                        |                            |                 |
|                                   | In what ways has the COVID-19 pandemic affected you and your family:                                   |                            |                 |
| Snacks                            | We are eating more snacks (e.g. crisps, chocolate) than we usually do.                                 | Strongly disagree          | 0 — No increase |
|                                   |                                                                                                        | Disagree                   |                 |
|                                   |                                                                                                        | Neither agree nor disagree | 1 — More        |
|                                   |                                                                                                        | Agree                      |                 |
|                                   |                                                                                                        | Strongly agree             |                 |
| Fruit & vegetable                 | We are eating more fruit and vegetables than we usually do.                                            | Strongly disagree          | 1 — No increase |
|                                   |                                                                                                        | Disagree                   |                 |
|                                   |                                                                                                        | Neither agree nor disagree | 0 — More        |
|                                   |                                                                                                        | Agree                      |                 |
|                                   |                                                                                                        | Strongly agree             |                 |
| Screen time                       | We are having more screen time - including television, smart phone, and computer - than we usually do. | Strongly disagree          | 0 — No increase |
|                                   |                                                                                                        | Disagree                   |                 |
|                                   |                                                                                                        | Neither agree nor disagree | 1 — More        |
|                                   |                                                                                                        | Agree                      |                 |
|                                   |                                                                                                        | Strongly agree             |                 |
| Physical activity                 | We are more physically active -that includes walking and exercise - than we usually do.                | Strongly disagree          | 1 — No increase |
|                                   |                                                                                                        | Disagree                   |                 |
|                                   |                                                                                                        | Neither agree nor disagree | 0 — More        |
|                                   |                                                                                                        | Agree                      |                 |
|                                   |                                                                                                        | Strongly agree             |                 |
| Mealtime routine                  | We are following mealtime routine more than we usually do.                                             | Strongly disagree          | 1 — No increase |
|                                   |                                                                                                        | Disagree                   |                 |
|                                   |                                                                                                        | Neither agree nor disagree | 0 — More        |
|                                   |                                                                                                        | Agree                      |                 |
|                                   |                                                                                                        | Strongly agree             |                 |
| Bedtime routine                   | We are following bedtime routine more than we usually do.                                              | Strongly disagree          | 1 — No increase |
|                                   |                                                                                                        | Disagree                   |                 |
|                                   |                                                                                                        | Neither agree nor disagree | 0 — More        |
|                                   |                                                                                                        | Agree                      |                 |
|                                   |                                                                                                        | Strongly agree             |                 |
| <b>Mental health</b>              |                                                                                                        |                            |                 |
| Psychological distress            | Over the last two weeks, how often have you been bothered by the following problems:                   |                            |                 |
|                                   | Feeling nervous, anxious, or on edge                                                                   | Not at all                 | 0               |
|                                   |                                                                                                        | Several days               | 1               |
|                                   |                                                                                                        | More than half the days    | 2               |
|                                   |                                                                                                        | Nearly everyday            | 3               |
|                                   | Not at all                                                                                             | 0                          |                 |

|                                                 |                                                                                                                                          |                         |                |                  |
|-------------------------------------------------|------------------------------------------------------------------------------------------------------------------------------------------|-------------------------|----------------|------------------|
|                                                 | Not being able to stop or control worrying                                                                                               | Several days            | 1              |                  |
|                                                 |                                                                                                                                          | More than half the days | 2              |                  |
|                                                 |                                                                                                                                          | Nearly everyday         | 3              |                  |
|                                                 | Feeling down, depressed, or hopeless                                                                                                     | Not at all              | 0              |                  |
|                                                 |                                                                                                                                          | Several days            | 1              |                  |
|                                                 |                                                                                                                                          | More than half the days | 2              |                  |
|                                                 | Little interest or pleasure in doing things                                                                                              | Nearly everyday         | 3              |                  |
|                                                 |                                                                                                                                          | Not at all              | 0              |                  |
|                                                 |                                                                                                                                          | Several days            | 1              |                  |
|                                                 |                                                                                                                                          | More than half the days | 2              |                  |
|                                                 |                                                                                                                                          | Nearly everyday         | 3              |                  |
|                                                 |                                                                                                                                          | PHQ-4                   | PHQ-4 Score    | Ranges from 0-12 |
|                                                 | 4 groups                                                                                                                                 | 0-2                     | 0 — None       |                  |
| 3-5                                             |                                                                                                                                          | 1 — Mild                |                |                  |
| 6-8                                             |                                                                                                                                          | 2 — Moderate            |                |                  |
| 9-12                                            |                                                                                                                                          | 3 — Severe              |                |                  |
| 2 groups                                        |                                                                                                                                          | 0-2                     | 0 — None       |                  |
|                                                 | 3-12                                                                                                                                     | 1 — Yes                 |                |                  |
| Worry about family                              | Worried about family members and close friends                                                                                           | Not at all              | 0              |                  |
|                                                 |                                                                                                                                          | Several days            | 1              |                  |
|                                                 |                                                                                                                                          | More than half the days | 2              |                  |
|                                                 |                                                                                                                                          | Nearly everyday         | 3              |                  |
|                                                 | Worry about family 2 groups                                                                                                              | Not at all              | 0 — No         |                  |
|                                                 | Several days —nearly everyday                                                                                                            | 1 — Yes                 |                |                  |
| <b>Participating research</b>                   | Has COVID-19 negatively affected your desire to participate in research?                                                                 | Not at all              | 0 — No         |                  |
|                                                 |                                                                                                                                          | A little bit            |                |                  |
|                                                 |                                                                                                                                          | Moderately              | 1 — Yes        |                  |
|                                                 |                                                                                                                                          | Quite a bit             |                |                  |
|                                                 |                                                                                                                                          | Extremely               |                |                  |
| <b>The ways of receiving health information</b> | Has COVID-19 affected the way you prefer to receive and communicate health-related information with health professionals?                | Yes                     | 1 — Yes        |                  |
|                                                 |                                                                                                                                          | No                      | 0 — No         |                  |
|                                                 | How likely is it that you would use the following modes to receive and communicate health-related information with health professionals? | Face-to-face            | Unlikely       | 0 — No           |
|                                                 |                                                                                                                                          |                         | Possibly       |                  |
|                                                 |                                                                                                                                          |                         | Likely         | 1 — Yes          |
|                                                 |                                                                                                                                          |                         | Almost certain |                  |
|                                                 |                                                                                                                                          |                         | Certain        |                  |
|                                                 |                                                                                                                                          | Telephone               | Unlikely       | 0 — No           |
|                                                 |                                                                                                                                          |                         | Possibly       |                  |
|                                                 |                                                                                                                                          |                         | Likely         | 1 — Yes          |
|                                                 |                                                                                                                                          |                         | Almost certain |                  |
|                                                 |                                                                                                                                          |                         | Certain        |                  |
|                                                 |                                                                                                                                          | SMS                     | Unlikely       | 0 — No           |
|                                                 |                                                                                                                                          |                         | Possibly       |                  |
|                                                 |                                                                                                                                          |                         | Likely         | 1 — Yes          |
| Almost certain                                  |                                                                                                                                          |                         |                |                  |

|                               |                                                                                                                                        |                                                                                                                                                                                   |         |
|-------------------------------|----------------------------------------------------------------------------------------------------------------------------------------|-----------------------------------------------------------------------------------------------------------------------------------------------------------------------------------|---------|
|                               | Video conference                                                                                                                       | Certain                                                                                                                                                                           | 0 — No  |
|                               |                                                                                                                                        | Unlikely                                                                                                                                                                          |         |
|                               |                                                                                                                                        | Possibly                                                                                                                                                                          |         |
|                               |                                                                                                                                        | Likely                                                                                                                                                                            |         |
|                               |                                                                                                                                        | Almost certain                                                                                                                                                                    |         |
|                               | Website                                                                                                                                | Certain                                                                                                                                                                           | 1 — Yes |
|                               |                                                                                                                                        | Unlikely                                                                                                                                                                          |         |
|                               |                                                                                                                                        | Possibly                                                                                                                                                                          |         |
|                               |                                                                                                                                        | Likely                                                                                                                                                                            |         |
|                               |                                                                                                                                        | Almost certain                                                                                                                                                                    |         |
|                               | Social media                                                                                                                           | Certain                                                                                                                                                                           | 0 — No  |
|                               |                                                                                                                                        | Unlikely                                                                                                                                                                          |         |
|                               |                                                                                                                                        | Possibly                                                                                                                                                                          |         |
|                               |                                                                                                                                        | Likely                                                                                                                                                                            |         |
|                               |                                                                                                                                        | Almost certain                                                                                                                                                                    |         |
|                               | Booklets                                                                                                                               | Certain                                                                                                                                                                           | 1 — Yes |
|                               |                                                                                                                                        | Unlikely                                                                                                                                                                          |         |
|                               |                                                                                                                                        | Possibly                                                                                                                                                                          |         |
|                               |                                                                                                                                        | Likely                                                                                                                                                                            |         |
|                               |                                                                                                                                        | Almost certain                                                                                                                                                                    |         |
| <b>Sources of information</b> |                                                                                                                                        |                                                                                                                                                                                   |         |
| <b>Covid-19 related</b>       | Since COVID-19 outbreak, have you followed COVID-19 related information based on information or advice from the following individuals? |                                                                                                                                                                                   |         |
|                               | Government officials                                                                                                                   | Yes                                                                                                                                                                               | 1 — Yes |
|                               |                                                                                                                                        | No                                                                                                                                                                                | 0 — No  |
|                               | Health professionals                                                                                                                   | Yes                                                                                                                                                                               | 1 — Yes |
|                               |                                                                                                                                        | No                                                                                                                                                                                | 0 — No  |
|                               | Family members                                                                                                                         | Yes                                                                                                                                                                               | 1 — Yes |
|                               |                                                                                                                                        | No                                                                                                                                                                                | 0 — No  |
|                               | Social media                                                                                                                           | Yes                                                                                                                                                                               | 1 — Yes |
|                               |                                                                                                                                        | No                                                                                                                                                                                | 0 — No  |
|                               | Educators                                                                                                                              | Yes                                                                                                                                                                               | 1 — Yes |
|                               |                                                                                                                                        | No                                                                                                                                                                                | 0 — No  |
|                               | <b>Food &amp; beverage</b>                                                                                                             | Since COVID-19 outbreak, have you changed the types of food and beverages that you and your family purchase or eat based on information or advice from the following individuals? |         |
| Government officials          |                                                                                                                                        | Yes                                                                                                                                                                               | 1 — Yes |
|                               |                                                                                                                                        | No                                                                                                                                                                                | 0 — No  |
| Health professionals          |                                                                                                                                        | Yes                                                                                                                                                                               | 1 — Yes |
|                               |                                                                                                                                        | No                                                                                                                                                                                | 0 — No  |
| Family members                |                                                                                                                                        | Yes                                                                                                                                                                               | 1 — Yes |
|                               |                                                                                                                                        | No                                                                                                                                                                                | 0 — No  |
| Social media                  |                                                                                                                                        | Yes                                                                                                                                                                               | 1 — Yes |
|                               |                                                                                                                                        | No                                                                                                                                                                                | 0 — No  |
| Educators                     |                                                                                                                                        | Yes                                                                                                                                                                               | 1 — Yes |
|                               |                                                                                                                                        | No                                                                                                                                                                                | 0 — No  |

|                          |                                                                                                                                                                             |     |         |
|--------------------------|-----------------------------------------------------------------------------------------------------------------------------------------------------------------------------|-----|---------|
| <b>Physical Activity</b> | Since COVID-19 outbreak, have you or your family changed your physical activity level e.g. walking, exercise based on information or advice from the following individuals? |     |         |
|                          | Government officials                                                                                                                                                        | Yes | 1 — Yes |
|                          |                                                                                                                                                                             | No  | 0 — No  |
|                          | Health professionals                                                                                                                                                        | Yes | 1 — Yes |
|                          |                                                                                                                                                                             | No  | 0 — No  |
|                          | Family members                                                                                                                                                              | Yes | 1 — Yes |
|                          |                                                                                                                                                                             | No  | 0 — No  |
|                          | Social media                                                                                                                                                                | Yes | 1 — Yes |
|                          |                                                                                                                                                                             | No  | 0 — No  |
|                          | Educators                                                                                                                                                                   | Yes | 1 — Yes |
|                          |                                                                                                                                                                             | No  | 0 — No  |
